# Supplementary material
Source: MDPI journal article supplement (https://www.mdpi.com/2071-1050/14/8/4443)
Supplement: s1 [file s1]

## Supplementary Material

**Table S1.** Surface (km<sup>2</sup>) occupied by native forests (temporal evolution).

| Watershed ID | 1997    | 2001  | 2005  | 2006 | 2008    | 2009    | 2013   | 2014 | 2015    | 2016    | AVG     | MIN     | MAX     | Net Change | Relative Change |
|--------------|---------|-------|-------|------|---------|---------|--------|------|---------|---------|---------|---------|---------|------------|-----------------|
| 1            | 17.64   | 17.64 | 16.31 |      |         |         | 81.67  |      |         |         | 33.31   | 16.31   | 81.67   | 26.13      | 363             |
| 2            | 92.77   | 72.77 | 86.03 |      |         |         | 178.53 |      |         |         | 107.53  | 72.77   | 178.53  | 23.56      | 92.4            |
| 3            | 38.01   | 10.18 | 24.13 |      |         |         | 212.56 |      |         |         | 71.22   | 10.18   | 212.56  | 12.13      | 459.2           |
| 4            | 865.54  |       |       |      |         | 854.36  |        |      |         | 1351.29 | 1023.73 | 854.36  | 1351.29 | 8.49       | 56.1            |
| 5            | 138.33  |       |       |      |         | 99.34   |        |      |         | 153.98  | 130.55  | 99.34   | 153.98  | 1.3        | 11.3            |
| 6            | 6.11    |       |       |      |         | 0.33    |        |      |         | 5.96    | 4.13    | 0.33    | 6.11    | -0.03      | -2.5            |
| 7            | 44.34   |       |       |      |         | 39.66   |        |      |         |         | 42      | 39.66   | 44.34   | -1.33      | -10.6           |
| 8            | 76.55   |       |       |      |         | 73.961  |        |      |         | 105.99  | 85.5    | 73.96   | 105.99  | 13.69      | 38.4            |
| 9            | 85.33   |       |       |      |         | 87.83   |        |      |         | 110.07  | 94.41   | 85.33   | 110.07  | 4.99       | 29              |
| 10           | 113.2   |       |       |      |         | 109.91  |        |      |         | 127.52  | 116.87  | 109.91  | 127.52  | 1.63       | 12.6            |
| 11           | 2509.94 |       |       |      |         | 2626.76 |        |      |         | 3822.61 | 2986.44 | 2509.94 | 3822.61 | 6.3        | 52.3            |
| 12           | 445.38  |       |       |      |         | 492.22  |        |      |         | 662.13  | 533.24  | 445.38  | 662.13  | 3.65       | 48.7            |
| 13           | 184.82  |       |       |      |         | 204.42  |        |      |         | 240.62  | 209.95  | 184.82  | 240.62  | 14.68      | 30.2            |
| 14           | 1645.33 |       |       |      |         | 1668    |        |      |         | 2287.74 | 1867.02 | 1645.33 | 2287.74 | 6.25       | 39              |
| 15           | 903.82  |       |       |      |         | 911.37  |        |      |         | 1402.89 | 1072.69 | 903.82  | 1402.89 | 6.7        | 55.2            |
| 16           | 389.36  |       |       |      |         | 388.73  |        |      |         | 405.8   | 394.63  | 388.73  | 405.8   | 1.84       | 4.2             |
| 17           | 58.09   |       |       |      |         | 58.24   |        |      |         | 240.22  | 118.85  | 58.09   | 240.22  | 11.41      | 313.6           |
| 18           | 403.12  |       |       |      |         | 387.1   |        |      |         | 479.11  | 423.11  | 387.1   | 479.11  | 3.66       | 18.9            |
| 19           | 8.62    |       |       |      |         | 11.29   |        |      |         | 15.46   | 11.79   | 8.62    | 15.46   | 2.6        | 79.3            |
| 20           | 2083.5  |       |       |      | 2042.51 |         |        |      | 2224.75 |         | 2116.92 | 2042.51 | 2224.75 | 1.42       | 6.8             |
| 21           | 371.33  |       |       |      | 396.96  |         |        |      | 455     |         | 407.76  | 371.33  | 455     | 4.95       | 22.5            |
| 22           | 245.36  |       |       |      | 243.94  |         |        |      | 268.29  |         | 252.53  | 243.94  | 268.29  | 2.43       | 9.3             |
| 23           | 728.72  |       |       |      | 708.27  |         |        |      | 689.62  |         | 708.87  | 689.62  | 728.72  | -2.37      | -5.4            |
| 24           | 452.98  |       |       |      | 432.97  |         |        |      | 410.47  |         | 432.14  | 410.47  | 452.98  | -3.39      | -9.4            |
| 25           | 431.78  |       |       |      | 411.84  |         |        |      | 451.74  |         | 431.79  | 411.84  | 451.74  | 1.41       | 4.6             |
| 26           | 123.93  |       |       |      | 98.48   |         |        |      | 120.44  |         | 114.28  | 98.48   | 123.93  | -1.72      | -2.8            |
| 27           | 7194.42 |       |       |      | 7060.87 |         |        |      | 7430.05 |         | 7228.45 | 7060.87 | 7430.05 | 0.97       | 3.3             |
| 28           | 3616.59 |       |       |      | 3585.23 |         |        |      | 3588.53 |         | 3596.78 | 3585.23 | 3616.59 | -0.41      | -0.8            |
| 29           | 924.62  |       |       |      | 930.52  |         |        |      | 1076.79 |         | 977.31  | 924.62  | 1076.79 | 4.24       | 16.5            |
| 30           | 51.68   |       |       |      | 49.56   |         |        |      | 52.5    |         | 51.24   | 49.56   | 52.5    | 0.18       | 1.6             |
| 31           | 1479.24 |       |       |      | 1552.84 |         |        |      | 1606.39 |         | 1546.16 | 1479.24 | 1606.39 | 2.27       | 8.6             |
| 32           | 938.89  |       |       |      | 979.18  |         |        |      | 1008.93 |         | 975.67  | 938.89  | 1008.93 | 2.57       | 7.5             |
| 33           | 645.68  |       |       |      | 691.64  |         |        |      | 715.94  |         | 684.42  | 645.68  | 715.94  | 5.42       | 10.9            |
| 34           | 460.9   |       |       |      | 493.16  |         |        |      | 518.88  |         | 490.98  | 460.9   | 518.88  | 3.41       | 12.6            |
| 35           | 3095.39 |       |       |      | 3382.01 |         |        |      | 3476.94 |         | 3318.12 | 3095.39 | 3476.94 | 4.87       | 12.3            |

|    |         |  |  |        |         |  |  |         |         |  |         |         |         |      |      |
|----|---------|--|--|--------|---------|--|--|---------|---------|--|---------|---------|---------|------|------|
| 36 | 1594.5  |  |  |        | 1778.89 |  |  |         | 1833.05 |  | 1735.48 | 1594.5  | 1833.05 | 8.32 | 15   |
| 37 | 73.24   |  |  |        | 96.31   |  |  |         | 97.91   |  | 89.15   | 73.24   | 97.91   | 3.36 | 33.7 |
| 38 | 728.8   |  |  |        | 748.85  |  |  |         | 769.07  |  | 748.9   | 728.8   | 769.07  | 2.44 | 5.5  |
| 39 | 308.16  |  |  |        | 324.12  |  |  |         | 339.91  |  | 324.06  | 308.16  | 339.91  | 5.89 | 10.3 |
| 40 | 2123.17 |  |  | 2137.3 |         |  |  | 2203.99 |         |  | 2154.82 | 2123.17 | 2203.99 | 2.45 | 3.8  |
| 41 | 48.97   |  |  | 45.79  |         |  |  | 49.33   |         |  | 48.03   | 45.79   | 49.33   | 0.14 | 0.7  |
| 42 | 229.21  |  |  | 230.62 |         |  |  | 241.29  |         |  | 233.71  | 229.21  | 241.29  | 3.73 | 5.3  |

**Table S2.** Surface (km<sup>2</sup>) occupied by forest plantations (temporal evolution).

| Watershed ID | 1997    | 2001  | 2005  | 2006 | 2008    | 2009    | 2013  | 2014 | 2015    | 2016    | AVG     | MIN     | MAX     | Net Change | Relative Change |
|--------------|---------|-------|-------|------|---------|---------|-------|------|---------|---------|---------|---------|---------|------------|-----------------|
| 1            |         |       |       |      |         |         |       |      |         |         | 0       | 0       | 0       | 0          | 0               |
| 2            | 8.84    | 18.11 | 23.23 |      |         |         | 19.23 |      |         |         | 17.35   | 8.84    | 23.23   | 2.85       | 117.4           |
| 3            |         | 0.25  | 24.79 |      |         |         | 0.13  |      |         |         | 8.39    | 0.13    | 24.79   | -0.01      | -48.4           |
| 4            | 98.94   |       |       |      |         | 336.2   |       |      |         | 331.43  | 255.52  | 98.94   | 336.2   | 4.06       | 235             |
| 5            | 2.53    |       |       |      |         | 2.07    |       |      |         | 2.55    | 2.38    | 2.07    | 2.55    | 0          | 1               |
| 6            |         |       |       |      |         |         |       |      |         |         | 0       | 0       | 0       | 0          | 0               |
| 7            | 0.63    |       |       |      |         | 1.39    |       |      |         | 1.46    | 1.16    | 0.63    | 1.46    | 0.24       | 131.9           |
| 8            | 3.87    |       |       |      |         | 7.23    |       |      |         | 4.78    | 5.29    | 3.87    | 7.23    | 0.43       | 23.6            |
| 9            | 0.69    |       |       |      |         | 1.12    |       |      |         | 1.58    | 1.13    | 0.69    | 1.58    | 0.18       | 129.3           |
| 10           |         |       |       |      |         |         |       |      |         |         | 0       | 0       | 0       | 0          | 0               |
| 11           | 1626.01 |       |       |      |         | 2846.41 |       |      |         | 2852.74 | 2441.72 | 1626.01 | 2852.74 | 5.89       | 75.4            |
| 12           | 17.75   |       |       |      |         | 38.22   |       |      |         | 41.1    | 32.36   | 17.75   | 41.1    | 0.39       | 131.5           |
| 13           | 66.2    |       |       |      |         | 65.06   |       |      |         | 65.1    | 65.45   | 65.06   | 66.2    | -0.29      | -1.7            |
| 14           | 1379.83 |       |       |      |         | 2243.55 |       |      |         | 2299.8  | 1974.4  | 1379.83 | 2299.8  | 8.95       | 66.7            |
| 15           | 1241.46 |       |       |      |         | 1998.35 |       |      |         | 2068.69 | 1769.5  | 1241.46 | 2068.69 | 11.11      | 66.6            |
| 16           | 46.51   |       |       |      |         | 72.22   |       |      |         | 65.02   | 61.25   | 46.51   | 72.22   | 2.08       | 39.8            |
| 17           | 426.16  |       |       |      |         | 711.18  |       |      |         | 730.81  | 622.72  | 426.16  | 730.81  | 19.09      | 71.5            |
| 18           | 332.64  |       |       |      |         | 446.01  |       |      |         | 467.72  | 415.46  | 332.64  | 467.72  | 6.5        | 40.6            |
| 19           | 178.75  |       |       |      |         | 176.21  |       |      |         | 180.68  | 178.55  | 176.21  | 180.68  | 0.73       | 1.1             |
| 20           | 1513.64 |       |       |      | 2101.51 |         |       |      | 2183.13 |         | 1932.76 | 1513.64 | 2183.13 | 6.73       | 44.2            |
| 21           | 421.06  |       |       |      | 513.34  |         |       |      | 543.76  |         | 492.72  | 421.06  | 543.76  | 7.26       | 29.1            |
| 22           | 290.59  |       |       |      | 310.08  |         |       |      | 303.64  |         | 301.44  | 290.59  | 310.08  | 1.38       | 4.5             |
| 23           | 0.51    |       |       |      | 2.95    |         |       |      | 2.7     |         | 2.06    | 0.51    | 2.95    | 0.13       | 427.3           |
| 24           |         |       |       |      | 0.02    |         |       |      | 0.07    |         | 0.05    | 0.02    | 0.07    | 0          | 281             |
| 25           | 110.02  |       |       |      | 185.67  |         |       |      | 195.31  |         | 163.67  | 110.02  | 195.31  | 6.04       | 77.5            |
| 26           |         |       |       |      | 0.19    |         |       |      | 0.31    |         | 0.25    | 0.19    | 0.31    | 0.06       | 65.7            |
| 27           | 4797.52 |       |       |      | 6204.21 |         |       |      | 6421.19 |         | 5807.64 | 4797.52 | 6421.19 | 6.7        | 33.8            |
| 28           | 54.34   |       |       |      | 68.91   |         |       |      | 94.79   |         | 72.68   | 54.34   | 94.79   | 0.59       | 74.4            |

|    |        |  |  |       |        |  |       |       |        |  |        |        |        |             |              |
|----|--------|--|--|-------|--------|--|-------|-------|--------|--|--------|--------|--------|-------------|--------------|
| 29 | 413.55 |  |  |       | 561.22 |  |       |       | 590.33 |  | 521.7  | 413.55 | 590.33 | <b>4.92</b> | <b>42.7</b>  |
| 30 | 202.76 |  |  |       | 271.95 |  |       |       | 278.71 |  | 251.14 | 202.76 | 278.71 | <b>17.1</b> | <b>37.5</b>  |
| 31 | 204.29 |  |  |       | 454.41 |  |       |       | 541.99 |  | 400.23 | 204.29 | 541.99 | <b>6.03</b> | <b>165.3</b> |
| 32 | 79.73  |  |  |       | 203.19 |  |       |       | 244.04 |  | 175.65 | 79.73  | 244.04 | <b>6.03</b> | <b>206.1</b> |
| 33 | 7.76   |  |  |       | 33.98  |  |       |       | 36.46  |  | 26.07  | 7.76   | 36.46  | <b>2.21</b> | <b>369.9</b> |
| 34 | 60.79  |  |  |       | 145.53 |  |       |       | 181.35 |  | 129.22 | 60.79  | 181.35 | <b>7.1</b>  | <b>198.3</b> |
| 35 | 351.05 |  |  |       | 588.1  |  |       |       | 650.52 |  | 529.89 | 351.05 | 650.52 | <b>3.82</b> | <b>85.3</b>  |
| 36 | 24.33  |  |  |       | 32.53  |  |       |       | 38.82  |  | 31.89  | 24.33  | 38.82  | <b>0.51</b> | <b>59.5</b>  |
| 37 | 45.34  |  |  |       | 89.39  |  |       |       | 93.5   |  | 76.07  | 45.34  | 93.5   | <b>6.55</b> | <b>106.2</b> |
| 38 | 49.84  |  |  |       | 108.05 |  |       |       | 137.49 |  | 98.46  | 49.84  | 137.49 | <b>5.32</b> | <b>175.8</b> |
| 39 | 27.78  |  |  |       | 36.02  |  |       |       | 41.85  |  | 35.22  | 27.78  | 41.85  | <b>2.61</b> | <b>50.6</b>  |
| 40 | 22.74  |  |  | 32.38 |        |  |       | 45.77 |        |  | 33.63  | 22.74  | 45.77  | <b>0.7</b>  | <b>101.3</b> |
| 41 |        |  |  | 0.13  |        |  | 1.43  |       |        |  | 0.78   | 0.13   | 1.43   | <b>0.52</b> | <b>981.5</b> |
| 42 | 4.05   |  |  | 2.91  |        |  | 15.17 |       |        |  | 7.37   | 2.91   | 15.17  | <b>3.43</b> | <b>274.7</b> |
